# Supplementary material for: Inner-filter effect of nitrogen-doped carbon quantum dots–MnO2 nanotubes for smartphone-integrated dual-mode sensing of glutathione and captopril
Source: Royal Society of Chemistry journal article supplement (doi:10.1039/d4ra03287j), 2024-01-01
Supplement: d4ra03287j1.pdf [file d4ra03287j1.pdf]

## Supporting Information

### Inner-Filter Effect Pair of Nitrogen-Doped Carbon Quantum Dots-MnO<sub>2</sub> Nanotubes for Smartphone-Integrated Dual-mode Sensing of Glutathione and Captopril.

Ankita B. Kujur<sup>a</sup>, Manmohan L. Satnami<sup>a\*</sup>, Yogyata Chawre<sup>a</sup>, Pinki Miri<sup>b</sup>, Akash Sinha<sup>a,b</sup>, Rekha Nagwanshi<sup>c</sup>, Indrapal Karbhal<sup>a</sup>, Kallol K. Ghosh<sup>a</sup>, Shamsh Pervez<sup>a</sup>,  
Manas Kanti Deb<sup>a</sup>

<sup>a</sup>School of Studies in Chemistry, Pt. Ravishankar Shukla University, Raipur-492010  
(Chhattisgarh), India

<sup>b</sup>Department of Chemistry, Govt. Nagarjuna P. G. College of Science, Raipur-492010  
(Chhattisgarh), India

<sup>c</sup>Department of Chemistry, Govt. Madhav Science P. G. College, Ujjain-456010 (Madhya Pradesh), India

[manmohanchem@gmail.com](mailto:manmohanchem@gmail.com)

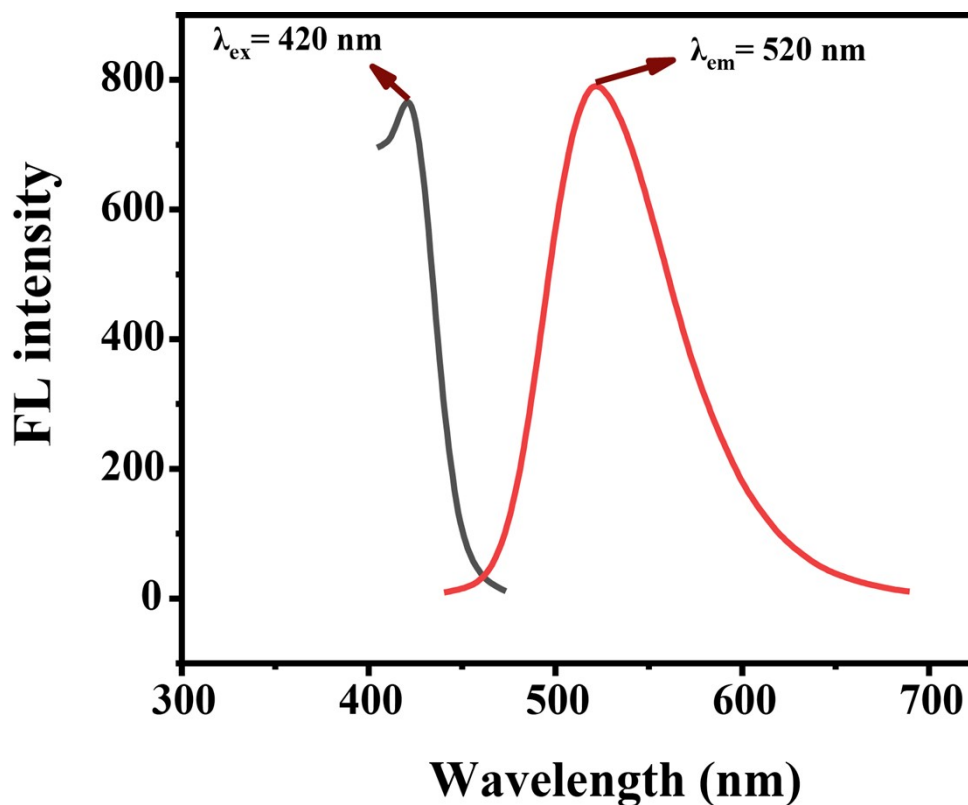

Figure S1: Normalized excitation and emission spectra of N-CQDs.

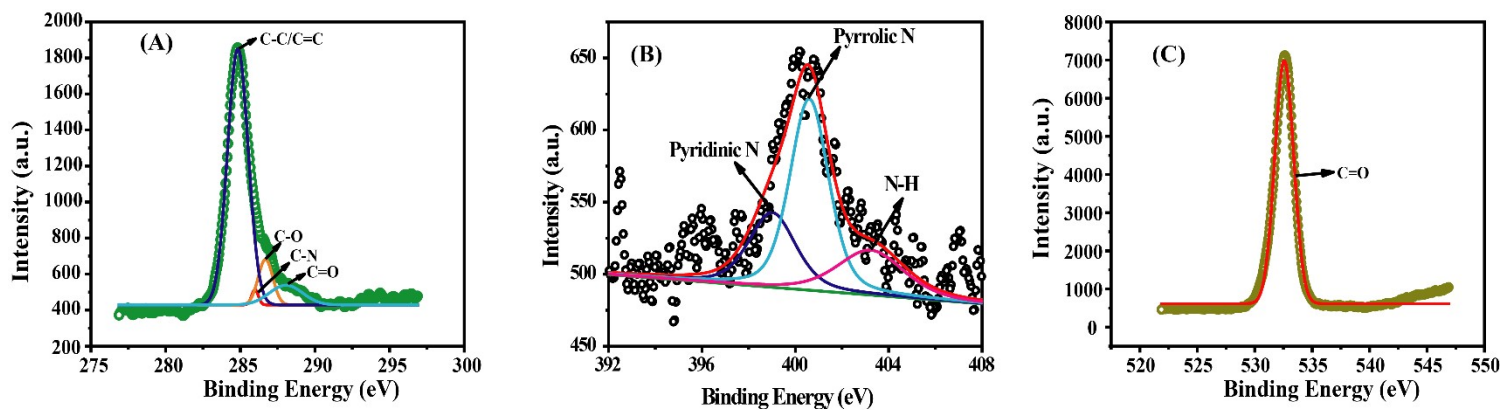

**Figure S2:** Deconvoluted XPS spectra of (A) C 1s, (B) N 1s and (C) O 1s of N-CQD.

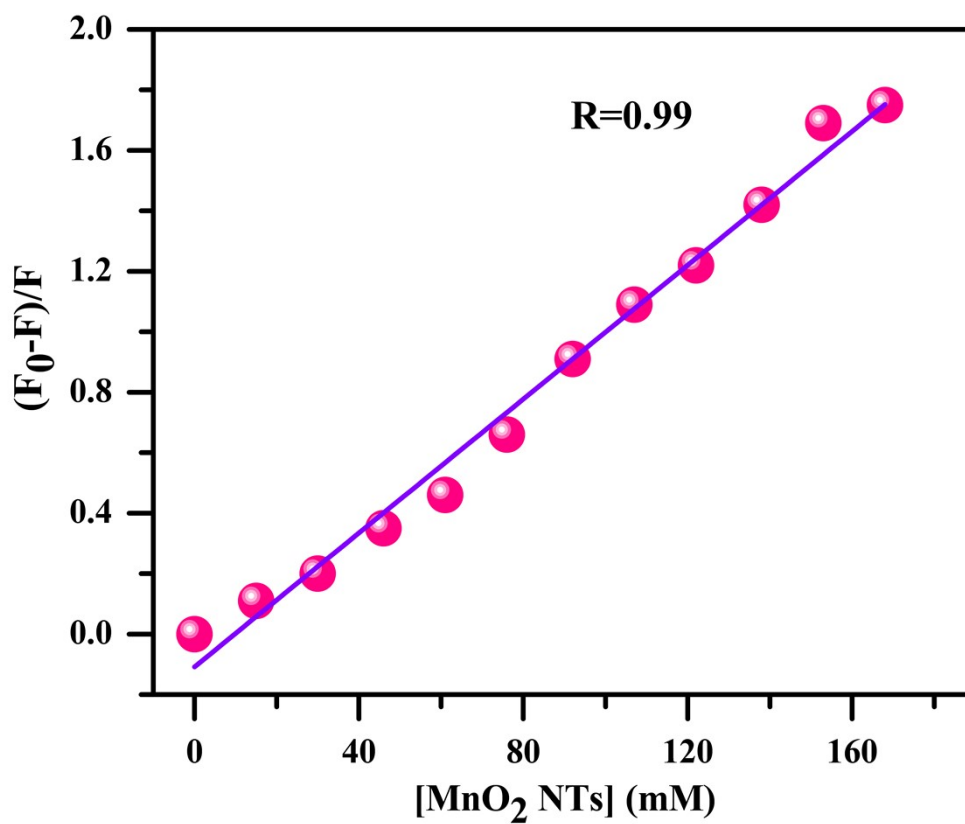

**Figure S3:** Stern-Volmer plot for MnO<sub>2</sub> NTs quenching N-CQDs.

**Table S1:** Comparison table of LOD values for the GSH by using different sensing probes and techniques.

| Sensing probe                                                                    | Technique                      | Detection range   | LOD            | References       |
|----------------------------------------------------------------------------------|--------------------------------|-------------------|----------------|------------------|
| AuNCs@BSA-MnO <sub>2</sub> NSs                                                   | Fluorescence                   | 0–0.5 mM          | 20 μM          | 1                |
| Cobalt phthalocyanine and multiwalled carbon functionalized with Carboxyl groups | Differential pulse Voltammetry | 0.5–7 mM          | 100 μM         | 2                |
| CoOOH NSs                                                                        | Colorimetric                   | 33 μM–1.3 mM      | 13.7 μM        | 3                |
| Naphthalene derivative containing piaszelenole (NDP)                             | Colorimetric                   | 0–80 mM           | 0.178 mM       | 4                |
| Ag <sub>2</sub> SQD/MnO <sub>2</sub> NS                                          | Fluorescence                   | 0.3–1.2 mM        | 60 μM          | 5                |
| <b>N-CQDs-MnO<sub>2</sub> NTs</b>                                                | <b>Fluorescence</b>            | <b>3.3-23.3μM</b> | <b>4.70 μM</b> | <b>This work</b> |

**Table S2:** Comparison table of LOD values for the CAP by using different sensing probes and techniques.

| Sensing probe                                                            | Technique                  | Detection range                                   | LOD                      | References       |
|--------------------------------------------------------------------------|----------------------------|---------------------------------------------------|--------------------------|------------------|
| Hierarchical hollow MnO <sub>2</sub> microspheres (HH-MnO <sub>2</sub> ) | Colorimetric               | 4.6–138.1 μM                                      | 1.2 μM                   | 6                |
| -                                                                        | Circular-disc spectroscopy | 10–70 μg mL <sup>-1</sup>                         | 2.38 μg mL <sup>-1</sup> | 7                |
| Hydroxypropyl β-cyclodextrin cross-linked polymer (HP-CDP)               | Fluorometric               | 9.2 × 10 <sup>-7</sup> - 4.6 × 10 <sup>-4</sup> M | 1.8 × 10 <sup>-7</sup> M | 8                |
| <b>N-CQDs-MnO<sub>2</sub> NTs</b>                                        | <b>Fluorescence</b>        | <b>3.3-30.0μM</b>                                 | <b>5.22 μM</b>           | <b>This work</b> |

## References

1. S. Lin, H. Cheng, Q. Ouyang and H. Wei, *Anal. Methods*, 2016, **8**, 3935–3940.
2. P. M. O. Moya, M. M. Alfaro, R. Kazemi, M. A. Alpuche-Avilés, S. Griveau, F. Bedioui and S. G. Granados, *Anal. Chem.* 2017, **89**, 10726–10733.
3. J. Li, L. Jiao, W. Xu, H. Yan, G. Chen, Y. Wu, L. Hu and W. Gu, *Sens. Actuators, B*, 2021, **329**, 129247.
4. X. Zeng, X. Zhang, B. Zhu, H. Jia, W. Yang, Y. Li and J. Xue, *Sens. Actuators, B*, 2011, **159**, 142–147.
5. Y. Shu, J. Gao, J. Chen, J. Yan, J. Sun, D. Jin, Q. Xu and X. Hu, *Talanta*, 2021, **221**, 121475.
6. M. Nazifi, R. Ahmadi, A. M. Ramezani and G. Absalan, *Anal. Bioanal. Chem.*, 2021, **413**, 7063-7072.
7. N. Rahman and S. Khan, *ACS Omega*, 2019, **4**, 4252-4258.
8. Y. Shi, J. Peng, X. Meng, T. Huang, J. Zhang and He, H. *Anal. Bioanal. Chem.*, 2018, **410**, 7373-7384.
